# Supplementary material for: UV Light Reveals the Diversity of Jurassic Shell Colour Patterns: Examples from the Cordebugle Lagerstätte (Calvados, France)
Source: PLoS One. 2015 Jun 3;10(6):e0126745. doi: 10.1371/journal.pone.0126745 (PMC4454669; doi:10.1371/journal.pone.0126745)
Supplement: S1 Table — (XLS) [file pone.0126745.s001.xls]

## Sheet: Feuil1
Family	Genus	Species	Authority	Number of examined specimens	Number of specimens emitting fluorence under UV light	Institution	Registration number	Collection
Gastropoda
Pleurotomariidae	Bathrotomaria	millepunctata	(Eudes-Deslongchamps, 1849)	3	0	MNHN	J10403	Cossmann
Proconulidae	Proconulus (Ozodochilus)	diomedes	(d'Orbigny, 1853)	5	0	UPMC	-	Le Marchand
Ataphridae	Ataphrus (Ataphrus)	marschmidti	Gründel and Kaim, 2006	1	1	MNHN	J11074	Cossmann
Ataphridae	Ataphrus (Ataphrus)	marschmidti	Gründel and Kaim, 2006	1	1	MNHN	J11070	Cossmann
Ataphridae	Ataphrus (Ataphrus)	marschmidti	Gründel and Kaim, 2006	1	1	UPMC	UPMC-136	Le Marchand
Ataphridae	Ataphrus (Endianaulax)	sarahae	(Chavan, 1954)	1	1	UPMC	UPMC-137	Le Marchand
Eucyclidae	Gerasimovcyclus	cf. lorioli	(Schmidt, 1905)	1	1	MNHN	J10402	Cossmann
Eucyclidae	Gerasimovcyclus	cf. lorioli	(Schmidt, 1905)	1	0	MNHN	J10462	Cossmann
Eucyclidae	Gerasimovcyclus	cf. lorioli	(Schmidt, 1905)	2	1	UPMC	-	Le Marchand
Eucyclidae	Gerasimovcyclus	cf. lorioli	(Schmidt, 1905)	1	0	UPMC	UPMC-199	Le Marchand
Eucyclidae	Gerasimovcyclus	cf. lorioli	(Schmidt, 1905)	1	0	UPMC	UPMC-129	Le Marchand
Neritidae	Neridomus	mais	(Buvignier, 1843)	12	0	MNHN	J11072	Cossmann
Neritidae	Neridomus	ovula	(Buvignier, 1843)	8	0	MNHN	B45749	de Morgan
Neritidae	Neridomus	ovula	(Buvignier, 1843)	1	0	MNHN	A32286	de Morgan
Neritidae	Neridomus	sp.	(Buvignier, 1843)	1	0	MNHN	A32268	de Morgan
Pseudomelaniidae	Pseudomelania	brasili	(de Loriol, 1874)	4	1	MNHN	A32278	Bigot
Pseudomelaniidae	Pseudomelania	brasili	(de Loriol, 1874)	1	1	MNHN	A46212	Bigot
Pseudomelaniidae	Pseudomelania	brasili	(de Loriol, 1874)	1	1	MNHN	A46213	Bigot
Pseudomelaniidae	Pseudomelania	brasili	(de Loriol, 1874)	1	0	MNHN	J10467	Cossmann
Pseudomelaniidae	Pseudomelania	brasili	(de Loriol, 1874)	1	1	MNHN	J10468	Cossmann
Pseudomelaniidae	Pseudomelania	brasili	(de Loriol, 1874)	1	1	MNHN	J10471	Cossmann
Pseudomelaniidae	Pseudomelania	brasili	(de Loriol, 1874)	1	1	MNHN	J10208	Cossmann
Pseudomelaniidae	Pseudomelania	brasili	(de Loriol, 1874)	1	0	UPMC	-	Le Marchand
Pseudomelaniidae	Pseudomelania	brasili	(de Loriol, 1874)	1	0	UPMC	-	Le Marchand
Pseudomelaniidae	Pseudomelania	brasili	(de Loriol, 1874)	2	0	UPMC	-	Le Marchand
Pseudomelaniidae	Pseudomelania	brasili	(de Loriol, 1874)	1	1	UPMC	-	Le Marchand
Pseudomelaniidae	Pseudomelania	brasili	(de Loriol, 1874)	1	1	UPMC	-	Le Marchand
Pseudomelaniidae	Pseudomelania	brasili	(de Loriol, 1874)	1	1	UPMC	UPMC-135	Le Marchand
Pseudomelaniidae	Pseudomelania	brasili	(de Loriol, 1874)	1	1	UPMC	UPMC-133	Curet
Pseudomelaniidae	Pseudomelania	brasili	(de Loriol, 1874)	1	0	UPMC	-	Curet
Pseudomelaniidae	Pseudomelania	brasili	(de Loriol, 1874)	1	1	UPMC	-	Curet
Pseudomelaniidae	Pseudomelania	brasili	(de Loriol, 1874)	1	1	UPMC	-	Curet
Pseudomelaniidae	Pseudomelania	cornelia	(d'Orbigny, 1851)	1	1	MNHN	A45819	Bigot
Pseudomelaniidae	Pseudomelania	cornelia	(d'Orbigny, 1851)	1	1	UPMC	UPMC-134	Curet
Pseudomelaniidae	Pseudomelania	collisa	(de Loriol, 1874)	3	1	UPMC
Pseudomelaniidae	Pseudomelania	collisa	(de Loriol, 1874)	1	1	UPMC	UPMC-130	Le Marchand
Pseudomelaniidae	Pseudomelania	collisa	(de Loriol, 1874)	1	1	UPMC	UPMC-131	Le Marchand
Pseudomelaniidae	Pseudomelania	collisa	(de Loriol, 1874)	1	1	UPMC	UPMC-132	UPMC
Ampullinidae	Ampullina	clio	(d'Orbigny, 1850)	3	1	MNHN	B45796	de Morgan
Ampullinidae	Ampullina	clio	(d'Orbigny, 1850)	1	1	MNHN	A30347	de Morgan
Ampullinidae	Ampullina	clio	(d'Orbigny, 1850)	4	0	MNHN	B45795	Bigot
Ampullinidae	Ampullina	clio	(d'Orbigny, 1850)	1	1	MNHN	A46211	Bigot
Ampullinidae	Ampullina	clio	(d'Orbigny, 1850)	1	1	MNHN	J10210	Cossmann
Ampullinidae	Ampullina	clio	(d'Orbigny, 1850)	1	1	MNHN	J10426	Cossmann
Ampullinidae	Ampullina	clio	(d'Orbigny, 1850)	1	1	MNHN	J10425	Cossmann
Ampullinidae	Ampullina	clio	(d'Orbigny, 1850)	2	0	UPMC	-	UPMC
Ampullinidae	Ampullina	clio	(d'Orbigny, 1850)	6	2	UPMC	-	Le Marchand
Ampullinidae	Ampullina	rupellensis	(d'Orbigny, 1852)	1	0	MNHN	J10398	Cossmann
Ampullinidae	Ampullina	hemisphaerica	(Roemer, 1836)	1	0	MNHN	J11068	Cossmann
Ampullinidae	Globularia (Globularia)	bigoti	(Cossmann, 1925)	1	0	MNHN	J10206	Cossmann
Ampullinidae	Globularia (Globularia)	bigoti	(Cossmann, 1925)	1	0	UPMC	-	Le Marchand
Ampullinidae	Cloughtonia	abbreviata	(Römer, 1836)	1	1	MNHN	J10209	Cossmann
Ampullinidae	Cloughtonia	abbreviata	(Römer, 1836)	1	1	MNHN	A32265	Bigot
Ampullinidae	Cloughtonia	abbreviata	(Römer, 1836)	1	1	MNHN	A32266	Bigot
Ampullinidae	Cloughtonia	abbreviata	(Römer, 1836)	1	1	MNHN	A32267	Bigot
Ampullinidae	Cloughtonia	michaelensis	(Buvignier, 1852)	1	0	MNHN	J10400	Cossmann
Ampullinidae	Cloughtonia	michaelensis	(Buvignier, 1852)	2	0	MNHN	A45767	Bigot
Procerithiidae	Nerineopsis	boidini	(de Loriol, 1873)	54	12	MNHN	J11071	Cossmann
Procerithiidae	Nerineopsis	boidini	(de Loriol, 1873)	1	1	MNHN	J10464	Cossmann
Procerithiidae	Paracerithium	climacinum	Cossmann, 1913	2	1	UPMC	-	Le Marchand
Procerithiidae	Paracerithium	climacinum	Cossmann, 1913	6	1	UPMC	-	Le Marchand
Procerithiidae	Paracerithium	echinophorum	Cossmann, 1913	4	1	UPMC	-	Le Marchand
Procerithiidae	Paracerithium	echinophorum	Cossmann, 1913	1	1	UPMC	UPMC-141	Le Marchand
Procerithiidae	Paracerithium	echinophorum	Cossmann, 1913	1	1	UPMC	UPMC-142	Le Marchand
Procerithiidae	Exelissa	diacritica	Cossmann, 1913	1	0	UPMC	-	UPMC
Procerithiidae	Exelissa	diacritica	Cossmann, 1913	1	1	MNHN	J10442	Cossmann
Procerithiidae	Exelissa	diacritica	Cossmann, 1913	2	1	MNHN	J11593	Cossmann
Procerithiidae	Exelissa	diacritica	Cossmann, 1913	1	1	MNHN	J11594	Cossmann
Procerithiidae	Exelissa	diacritica	Cossmann, 1913	1	1	MNHN	J11595	Cossmann
Procerithiidae	Exelissa	diacritica	Cossmann, 1913	35	22	MNHN	J10444	Cossmann
Procerithiidae	Exelissa	diacritica	Cossmann, 1913	32	19	MNHN	J10429	Cossmann
Procerithiidae	Exelissa	diacritica	Cossmann, 1913	1	1	MNHN	J10447	Cossmann
Procerithiidae	Exelissa	diacritica	Cossmann, 1913	1	1	MNHN	J10445	Cossmann
Procerithiidae	Exelissa	diacritica	Cossmann, 1913	1	1	MNHN	J10446	Cossmann
Procerithiidae	Exelissa	diacritica	Cossmann, 1913	2	0	MNHN	J11069	Cossmann
Procerithiidae	Exelissa	diacritica	Cossmann, 1913	1	1	MNHN	J10443	Cossmann
Procerithiidae	Exelissa	diacritica	Cossmann, 1913	1	0	UPMC	-	UPMC
Procerithiidae	Exelissa	distans	Cossmann, 1913	1	1	MNHN	A32270	de Morgan
Procerithiidae	Exelissa	distans	Cossmann, 1913	5	4	UPMC	-	Le Marchand
Procerithiidae	Exelissa	distans	Cossmann, 1913	1	1	UPMC	UPMC-143	Le Marchand
Procerithiidae	Exelissa	distans	Cossmann, 1913	1	1	UPMC	-	Curet
Rissoidae	Trochoturbella (Calvadosia)	brasili	Cossmann, 1921	3	0	MNHN	J11504	Cossmann
Ceritellidae	Pseudonerinea	caecilia	(d'Orbigny, 1851)	8	4	MNHN	J10466	Cossmann
Ceritellidae	Pseudonerinea	caecilia	(d'Orbigny, 1851)	1	1	MNHN	J11591	Cossmann
Ceritellidae	Pseudonerinea	caecilia	(d'Orbigny, 1851)	1	1	MNHN	J11592	Cossmann
Ceritellidae	Pseudonerinea	caecilia	(d'Orbigny, 1851)	1	0	MNHN	J08532	Cossmann
Ceritellidae	Pseudonerinea	caecilia	(d'Orbigny, 1851)	2	0	MNHN	J10465	Cossmann
Ceritellidae	Pseudonerinea	caecilia	(d'Orbigny, 1851)	3	1	MNHN	A46317	Bigot
Ceritellidae	Pseudonerinea	caecilia	(d'Orbigny, 1851)	1	0	UPMC	-	Curet
Ceritellidae	Pseudonerinea	caecilia	(d'Orbigny, 1851)	1	1	UPMC	-	Curet
Bullinidae	Sulcoactaeon	hordeolus	(Buvignier, 1852)	3	0	UPMC	-	Le Marchand
Acteonellidae	Cylindrobullina	stueri	(Cossmann, 1895)	1	0	MNHN	A46214	de Morgan
Acteonellidae	Cylindrobullina	stueri	(Cossmann, 1895)	6	0	UPMC	-	Le Marchand
Acteonellidae	Cylindrobullina	gymna	(Cossmann, 1895)	3	0	UPMC	-	Le Marchand
Acteonellidae	Trochactaeonina	bigoti	Cossmann, 1895	3	0	UPMC	-	Le Marchand
Acteonellidae	Trochactaeonina	bigoti	Cossmann, 1895	1	0	MNHN	J11076	Cossmann
Bivalvia
Astartidae	Neocrassina	ovata	(Smith, 1817)	3	1	MNHN	J11073	Cossmann
Astartidae	Neocrassina	ovata	(Smith, 1817)	1	1	MNHN	J11075	Cossmann
Astartidae	Neocrassina	ovata	(Smith, 1817)	1	1	MNHN	J10472	Cossmann
Astartidae	Neocrassina	ovata	(Smith, 1817)	1	1	MNHN	J10473	Cossmann
Astartidae	Nicaniella	communis	(Zittel & Goubert, 1861)	68	17	MNHN	J10475	Cossmann
Astartidae	Nicaniella	communis	(Zittel & Goubert, 1861)	1	1	MNHN	J10474	Cossmann
Astartidae	Nicaniella	communis	(Zittel & Goubert, 1861)	7	1	UPMC	-	UPMC
Astartidae	Nicaniella	bruni	Chavan, 1952	1	1	UPMC	UPMC-145	UPMC
Astartidae	Nicaniella	bruni	Chavan, 1952	1	1	UPMC	UPMC-146	UPMC
Astartidae	Nicaniella	bruni	Chavan, 1952	18	2	UPMC	-	UPMC
Astartidae	Nicaniella	morini	(de Loriol, 1875)	2	1	MNHN	J10427	Cossmann
Astartidae	Nicaniella	morini	(de Loriol, 1875)	14	6	MNHN	J10428	Cossmann
Astartidae	Nicaniella	morini	(de Loriol, 1875)	1	1	UPMC	UPMC-147	UPMC
Astartidae	Nicaniella	morini	(de Loriol, 1875)	5	2	UPMC	-	UPMC
Astartidae	Nicaniella	praemysis	(Chavan, 1945)	2	0	UPMC	-	UPMC
Astartidae	Nicaniella	persimilis	(Chavan, 1952)	3	0	UPMC	-	UPMC
Astartidae	Nicaniella	soror	(Chavan, 1945)	6	0	UPMC	-	UPMC
Neomiodontidae	Neomiodon	percrassus	Chavan, 1945	13	0	MNHN	J10476	Cossmann
Neomiodontidae	Neomiodon	percrassus	Chavan, 1945	21	6	UPMC	-	UPMC
Neomiodontidae	Neomiodon	percrassus	Chavan, 1945	1	1	UPMC	UPMC-148	UPMC
Neomiodontidae	Neomiodon	ovatostriatus	Chavan, 1945	26	3	MNHN	J07785	Cossmann
Lucinidae	Jagonoma	circumcisa	(Zittel and Goubert, 1861)	2	0	MNHN	J11583	Cossmann
Lucinidae	Jagonoma	circumcisa	(Zittel and Goubert, 1861)	1	1	MNHN	J11585	Cossmann
Lucinidae	Jagonoma	circumcisa	(Zittel and Goubert, 1861)	1	1	MNHN	J11586	Cossmann
Lucinidae	Jagonoma	circumcisa	(Zittel and Goubert, 1861)	1	1	MNHN	J11587	Cossmann
Lucinidae	Jagonoma	circumcisa	(Zittel and Goubert, 1861)	1	1	MNHN	J11588	Cossmann
Lucinidae	Mesomiltha	pulchra	(Zittel and Goubert, 1861)	1	1	MNHN	J11584	Cossmann
Lucinidae	Mesomiltha	pulchra	(Zittel and Goubert, 1861)	2	1	UPMC	-	Le Marchand
Lucinidae	Mesomiltha	pulchra	(Zittel and Goubert, 1861)	1	1	UPMC	UPMC-144	Le Marchand
Lucinidae	Mesolinga	typica	Chavan, 1952	17	5	MNHN	J10401	Cossmann
Lucinidae	Mesolinga	typica	Chavan, 1952	1	1	MNHN	J11589	Cossmann
Lucinidae	Mesolinga	typica	Chavan, 1952	1	1	MNHN	J11590	Cossmann
Ostreidae	Liostrea	?brasili	(Chavan, 1952)	26	0	UPMC	-	UPMC
Myophorellidae	Myophorella	bronni	(Agassiz, 1840)	1	0	UPMC	-	UPMC
Myophorellidae	Myophorella	bronni	(Agassiz, 1840)	1	1	UPMC	UPMC-138	UPMC
Myophorellidae	Myophorella	bronni	(Agassiz, 1840)	2	2	UPMC	-	UPMC
Myophorellidae	Myophorella	bronni	(Agassiz, 1840)	1	1	UPMC	UPMC-139	UPMC
Myophorellidae	Myophorella	bronni	(Agassiz, 1840)	1	1	UPMC	UPMC-140	UPMC
Myophorellidae	Myophorella	bronni	(Agassiz, 1840)	2	1	UPMC	-	UPMC
Myophorellidae	Myophorella	bronni	(Agassiz, 1840)	2	1	UPMC	-	UPMC
Myophorellidae	Myophorella	bronni	(Agassiz, 1840)	3	1	MNHN	A46229	Raynaud
Myophorellidae	Myophorella	bronni	(Agassiz, 1840)	2	1	UPMC	-	Le Marchand
Trigoniidae	Trigonia	papillata	(Agassiz, 1840)	1	0	UPMC	-	Curet
Cucullaeidae	Cucullaea (Idonearca)	contracta	Phillips, 1829	2	0	MNHN	J10399	Cossmann
Cucullaeidae	Cucullaea (Idonearca)	contracta	Phillips, 1829	1	0	UPMC	-	Le Marchand
Cucullaeidae	Cucullaea (Idonearca)	contracta	Phillips, 1829	1	0	UPMC	-	Le Marchand
Mytilidae	Modiolus	imbricatus	Sowerby, 1818	2	1	UPMC	-	UPMC
Mytilidae	Modiolus	imbricatus	Sowerby, 1818	1	1	UPMC	UPMC-149	UPMC
Mytilidae	Modiolus	bipartittus	Sowerby, 1818	7	0	UPMC	-	Le Marchand
