# Supplementary material for: UV Light Reveals the Diversity of Jurassic Shell Colour Patterns: Examples from the Cordebugle Lagerstätte (Calvados, France)
Source: PLoS One. 2015 Jun 3;10(6):e0126745. doi: 10.1371/journal.pone.0126745 (PMC4454669; doi:10.1371/journal.pone.0126745)
Supplement: S2 Table — (XLS) [file pone.0126745.s002.xls]

## Sheet: Calyptrophorus
Identifiant de l'échantillon	Nombre de spécimens	Localité	Département	Répartition stratigraphique	Auteur	Observations	Biozones	Statut
Calyptrophorus tridinoferus
Staadt (a25360)	6	Bell's landing	Alabama (E-U)	Thanétien	Conrad ?	cassures au niveau de la lèvre externe et du canal siphonal	NP6-7-8
Calyptrophorus termieri
R05571	4	Imi n'Tanout	Maroc	Danien	Salvan, 1954	variable, cassures au niveau des extrémités et de la fin du dernier tour (lèvre externe), conservation moyenne		Syntype

## Sheet: Rimella
Identifiant de l'échantillon	Nombre de spécimens	Localité	Département	Répartition stratigraphique	Auteur	Observations	Biozones
Rimella interrupta
B63155	1	Aizy-Jouy	Aisne (02)	Cuisien	(Deshayes, 1865)	cassures au niveau de la lèvre externe et du dernier tour de spire	NP12
Faullummel (a25289)	35	Saint-Gobain	Aisne (02)	Cuisien	(Deshayes, 1865)	quelques cassures au niveau de la lèvre externe et du canal siphonal, bonne conservation	NP12
Rimella fissurella
? (a25291)	8	Damery	Marne (51)	Lutétien moyen	(Linnaeus, 1767)	extrémité du canal siphonal cassée, bonne conservation dans l'ensemble	NP15
? (a25296)	177	Région parisienne	?	Lutétien moyen	(Linnaeus, 1767)	entiers ou canal siphonal et lèvre externe cassés, bonne conservation dans l'ensemble, 34 grands, 143 petits	NP15
B73149	10	Senlis	Oise (60)	Lutétien moyen	(Linnaeus, 1767)	extrémité du canal siphonal cassée, bonne conservation dans l'ensemble sauf tâches (de colle ?) pour 3	NP15
Braillon (a25290)	6	Damery	Marne (51)	Lutétien moyen	(Linnaeus, 1767)	entiers sauf extrémité du canal siphonal et parfois cassure au niveau de la lèvre externe, grands	NP15
Braillon (a25293)	22	Cuise-la-Motte	Oise (60)	Cuisien	(Linnaeus, 1767)	variable, cassure au niveau du canal siphonal en général, jeunes	NP12
Braillon (a25292)	3	Requiécourt	Oise (60)	Lutétien moyen	(Linnaeus, 1767)	entiers sauf extrémité du canal siphonal, grands	NP15
Braillon (a25295)	2	Requiécourt	Oise (60)	Lutétien moyen	(Linnaeus, 1767)	entier sauf extrémité du canal siphonal	NP15
Braillon (a25294)	3	Ver	Oise (60)	Bartonien	(Linnaeus, 1767)	entier sauf extrémité du canal siphonal, grands	NP16
Rimella rimosa
Braillon (a25298)	4	Haravilliers (Le Quoniam)	Val d'Oise (95)	Marinésien (Bartonien)	(Solander in Brander, 1766)	variable, cassure au niveau du canal siphonal et/ou au niveau des tours de spire	NP16
Braillon (a25297)	1	Le Fayel	Oise (60)	Auversien (Bartonien)	(Solander in Brander, 1766)	entier	NP16
Rimella sp.
S11449 Peron	1	Barton	Angleterre	Bartonien		manque la partie apicale et la lèvre externe	NP16

## Sheet: Terebellopsis
Identifiant de l'échantillon	Nombre de spécimens	Localité	Département, Région	Répartition stratigraphique	Auteur	Observations	Biozones
Terebellopsis brauni
R53079 (Courtesol., Griffe)	1	Jonquières	Aude (11)	Yprésien (Ilerdien)	Leymerie, 1846	conservation bof	NP10-11
R53077 (Courtesol., Griffe)	8	Fabrezan	Aude (11)	Yprésien (Ilerdien)	Leymerie, 1846	partie apicale ?	NP10-11
R53078 (Courtesol., Griffe)	2	Montazels	Aude (11)	Yprésien (Ilerdien)	Leymerie, 1846	conservation bof	NP10-11
R53081 (Courtesol., Griffe)	4	Ronqua	Aude (11)	Yprésien (Ilerdien)	Leymerie, 1846	conservation bof	NP10-11
R53080 (Courtesol., Griffe)	6	Montolieu	Aude (11)	Yprésien (Ilerdien)	Leymerie, 1846	conservation bof	NP10-11
R53082 (Courtesol., Griffe)	7	Saissac	Aude (11)	Yprésien (Ilerdien)	Leymerie, 1846	conservation bof	NP10-11
R64486 (Courtesol., Griffe)	1	Le Boucha	Aude (11)	Yprésien (Ilerdien)	Leymerie, 1846	partie apicale avec tours de spire apparents	NP10-11
B22385 (Tchihatcheff)	1	Zafiranboli	Turquie	Lutétien	Leymerie, 1846

## Sheet: Table S2
Family	Genus	Species	Authority	Epoch	Stage	Colour under UV light	Clade
GASTROPODA
Fissurellidae	Diodora	squamosa	(Deshayes, 1824)	Eocene	Lutetian	red	Vetigastropoda
	Diodora	labiata	(Lamarck, 1802)	Eocene	Lutetian	red	Vetigastropoda
Chilodontidae	Danilia	perelegans	(Deshayes, 1863)	Eocene	Lutetian	red	Vetigastropoda
Eucyclidae	Calliomphalus	squamulosus	(Lamarck, 1804)	Eocene	Lutetian	red	Vetigastropoda
	Calliomphalus	firketi	(Briart & Cornet, 1887)	Palaeocene	Thanetian	red	Vetigastropoda
	Gerasimovcyclus	cf. lorioli	(Schmidt, 1905)	Late Jurassic	Oxfordian	yellow-white	Vetigastropoda
Trochidae	Tectus (Tectus)	crenularis	(Lamarck, 1804)	Eocene	Lutetian	red	Vetigastropoda
	Tectus (Tectus)	mitratus	(Deshayes, 1832)	Eocene	Lutetian	red	Vetigastropoda
	Jujubinus (Strigosella)	lamarckii lamarckii	(Deshayes, 1832)	Eocene	Lutetian	red	Vetigastropoda
	Jujubinus (Strigosella)	lamarckii angustus	(Deshayes, 1864)	Eocene	Lutetian	red	Vetigastropoda
	Jujubinus (Strigosella)	sulcatus	(Lamarck, 1804)	Eocene	Lutetian	red	Vetigastropoda
Ataphridae	Ataphrus (Ataphrus)	marschmidti	Gründel & Kaim, 2006	Late Jurassic	Oxfordian	red	Vetigastropoda
	Ataphrus (Endianaulax)	sarahae	(Chavan, 1954)	Late Jurassic	Oxfordian	red	Vetigastropoda
Calliostomatidae	Metaconulus	buchozi	Le Renard, 1994	Eocene	Lutetian	red	Vetigastropoda
Solariellidae	Solariella (Solariella)	turbinoides	(Lamarck, 1804)	Eocene	Lutetian	red	Vetigastropoda
Turbinidae	Turbo (Heteroninella)	parkinsoni	de Basterot, 1825	Oligocene	Rupelian	red	Vetigastropoda
	Angaria	subcalcar	(d'Orbigny, 1850)	Eocene	Lutetian	red	Vetigastropoda
	Angaria	regleyana	(Deshayes, 1832)	Eocene	Bartonian	red	Vetigastropoda
	Cirsochilus	lamarckii	(d'Orbigny, 1850)	Eocene	Lutetian	red	Vetigastropoda
	Cirsochilus	caillati	(Deshayes, 1863)	Eocene	Lutetian	red	Vetigastropoda
	Collonia (Collonia)	marginata	(Lamarck, 1804)	Eocene	Lutetian	red	Vetigastropoda
	Collonia (Heniastoma)	flammulata	Cossmann, 1888	Eocene	Lutetian	red	Vetigastropoda
	Collonia (Heniastoma)	canalifera	(Lamarck, 1804)	Eocene	Lutetian	red	Vetigastropoda
Phasianellidae	Tricolia (Phasianochilus)	turbinoides	(Lamarck, 1804)	Eocene	Lutetian	red	Vetigastropoda
Pseudomelaniidae	Bayania	lactea	(Bruguière, 1789)	Eocene	Lutetian	yellow-white	Caenogastropoda
	Pseudomelania	brasili	(Bigot, 1938)	Late Jurassic	Oxfordian	yellow-white	Caenogastropoda
	Pseudomelania	cornelia	(d'Orbigny, 1851)	Late Jurassic	Oxfordian	yellow-white	Caenogastropoda
	Pseudomelania	collisa	(de Loriol, 1874)	Late Jurassic	Oxfordian	yellow-white	Caenogastropoda
Trypanaxidae	Trypanaxis	umbilicata	(Lamarck, 1804)	Eocene	Lutetian	yellow-white	Caenogastropoda
Ampullinidae	Ampullina	aizyensis	(Bayan, 1870)	Palaeocene	Thanetian	yellow-white	Caenogastropoda
	Ampullina	chenayensis	(Cossmann, 1892)	Palaeocene	Thanetian	yellow-white	Caenogastropoda
	Ampullina	intermedia	(Deshayes, 1832)	Eocene	Ypresian	yellow-white	Caenogastropoda
	Ampullina	parisiensis	(d'Orbigny, 1850)	Eocene	Bartonian	yellow-white	Caenogastropoda
	Ampullina	parisiensis	(d'Orbigny, 1850)	Eocene	Priabonian	yellow-white	Caenogastropoda
	Ampullina	stampinensis	(Cossmann & Lambert, 1884)	Oligocene	Rupelian	yellow-white	Caenogastropoda
	Globularia (Globularia)	semipatula	(Deshayes, 1864)	Eocene	Ypresian	yellow-white	Caenogastropoda
	Globularia (Globularia)	patuloides	(Cossmann & Pissarro, 1902)	Eocene	Bartonian	yellow-white	Caenogastropoda
	Globularia (Deshayesia)	parisiensis	(Raulin, 1844)	Oligocene	Rupelian	yellow-white	Caenogastropoda
	Globularia (Globularia)	subdepressa	(Grateloup, 1827)	Oligocene	Rupelian	yellow-white	Caenogastropoda
	Globularia (Globularia)	peyreirensis	(Cossmann & Peyrot, 1919)	Oligocene	Chattian	yellow-white	Caenogastropoda
	Globularia (Cernina)	compressa	(Basterot, 1825)	Miocene	Aquitanian	yellow-white	Caenogastropoda
	Globularia (Cernina)	sp.		Miocene	Aquitanian	yellow-white	Caenogastropoda
	Amaurellina	sinuosa	(d'Orbigny, 1850)	Eocene	Ypresian	yellow-white	Caenogastropoda
	Pachycrommium	eburnoides	(Grateloup, 1804)	Miocene	Burdigalian	yellow-white	Caenogastropoda
	Ampullina	clio	(d'Orbigny, 1850)	Late Jurassic	Oxfordian	yellow-white	Caenogastropoda
	Cloughtonia	abbreviata	(Römer, 1836)	Late Jurassic	Oxfordian	yellow-white	Caenogastropoda
Cerithiidae	Fastigiella (Fastigiella)	rugosa	(Lamarck, 1804)	Eocene	Lutetian	yellow-white	Caenogastropoda
	Clava (Striovertagus)	striata	(Bruguière, 1792)	Eocene	Lutetian	yellow-white	Caenogastropoda
	Ptychocerithium	inabsolutum	(Deshayes, 1864)	Eocene	Lutetian	yellow-white	Caenogastropoda
	Ptychocerithium	lamellosum	(Bruguière, 1792)	Eocene	Lutetian	yellow-white	Caenogastropoda
	Tenuicerithium	boussaci	Le Renard, 1994	Eocene	Lutetian	yellow-white	Caenogastropoda
	Tenuicerithium	crassicostatum	(Deshayes, 1864)	Eocene	Lutetian	yellow-white	Caenogastropoda
	Tenuicerithium	subulatum	(Lamarck, 1804)	Eocene	Lutetian	yellow-white	Caenogastropoda
	Bittium (Bittium)	semigranosum	(Lamarck, 1804)	Eocene	Lutetian	yellow-white	Caenogastropoda
	Bittium (Semibittium)	cancellatum	(Lamarck, 1804)	Eocene	Lutetian	yellow-white	Caenogastropoda
	Bittium (Bittium)	transenna	(Bayan 1873)	Eocene	Lutetian	yellow-white	Caenogastropoda
Potamididae	Terebralia (Gravesicerithium)	thiara	(Bruguière, 1792)	Eocene	Lutetian	yellow-white	Caenogastropoda
	Terebralia (Gravesicerithium)	mitra	(Lamarck, 1804)	Eocene	Lutetian	yellow-white	Caenogastropoda
	Granulolabium (Granulolabium)	substriatum	(Lamarck, 1804)	Eocene	Lutetian	yellow-white	Caenogastropoda
	Granulolabium (Granulolabium)	multinodosum	(Deshays, 1833)	Eocene	Lutetian	yellow-white	Caenogastropoda
	Tympanotonos (Eotympanotonos)	conulus	(Bruguière, 1792)	Eocene	Lutetian	yellow-white	Caenogastropoda
	Tympanotonos (Ptychopotamides)	semicoronatus	(Lamarck, 1804)	Eocene	Lutetian	yellow-white	Caenogastropoda
Batillariidae	Vicinocerithium	calcitrapoides	(Lamarck, 1804)	Eocene	Lutetian	yellow-white	Caenogastropoda
Brachytrematidae	Benoistia	muricoides	(Lamarck, 1804)	Eocene	Lutetian	yellow-white	Caenogastropoda
Diastomatidae	Diastoma	costellata	(Lamarck, 1804)	Eocene	Lutetian	yellow-white	Caenogastropoda
Pachychilidae	Faunus	dispar	(Deshayes, 1862)	Eocene	Lutetian	yellow-white	Caenogastropoda
Turritellidae	Haustator	adulteratus	(Deshayes, 1861)	Eocene	Lutetian	yellow-white	Caenogastropoda
	Haustator	funiculosus	(Deshayes, 1832)	Eocene	Lutetian	yellow-white	Caenogastropoda
	Haustator	elegans	(Deshayes, 1861)	Eocene	Lutetian	yellow-white	Caenogastropoda
	Haustator	mitis	(Deshayes, 1861)	Eocene	Lutetian	yellow-white	Caenogastropoda
	Haustator	imbricatarius	(Lamarck, 1804)	Eocene	Lutetian	yellow-white	Caenogastropoda
	Haustator	uniangularis	(Lamarck, 1804)	Eocene	Lutetian	yellow-white	Caenogastropoda
	Sigmesalia	multisulcata	(Lamarck, 1804)	Eocene	Lutetian	yellow-white	Caenogastropoda
Procerithiidae	Nerineopsis	boidini	(de Loriol, 1874)	Late Jurassic	Oxfordian	yellow-white	Caenogastropoda
	Paracerithium	echinophorum	Cossmann, 1913	Late Jurassic	Oxfordian	yellow-white	Caenogastropoda
	Paracerithium	climacinum	Cossmann, 1913	Late Jurassic	Oxfordian	yellow-white	Caenogastropoda
	Exelissa	diacritica	Cossmann, 1913	Late Jurassic	Oxfordian	yellow-white	Caenogastropoda
	Exelissa	distans	Cossmann, 1913	Late Jurassic	Oxfordian	yellow-white	Caenogastropoda
Cypraeidae	Cypraea	sp.		Miocene	Langhian	yellow-white	Caenogastropoda
Littorinidae	Melarhaphe	deshayesi	(Cossmann, 1888)	Eocene	Lutetian	yellow-white	Caenogastropoda
	Littoraria (Littorinopsis)	elongata	(Defrance, 1827)	Eocene	Lutetian	yellow-white	Caenogastropoda
Pomatiidae	Dissostoma	mumia	(Lamarck, 1804)	Eocene	Lutetian	yellow-white	Caenogastropoda
Naticidae	Natica	exerta	Deshayes, 1864	Eocene	Lutetian	yellow-white	Caenogastropoda
	Sigatica (Sigatica)	hantoniensis	(Pilkington, 1804)	Eocene	Lutetian	yellow-white	Caenogastropoda
	Cepatia	cepacea	(Lamarck, 1804)	Eocene	Lutetian	yellow-white	Caenogastropoda
	Payraudeautia	perforata	(Deshayes, 1864)	Eocene	Lutetian	yellow-white	Caenogastropoda
	Natica	caillati	Deshayes, 1864	Eocene	Lutetian	yellow-white	Caenogastropoda
	Euspira	venusta	(Deshayes, 1864)	Eocene	Lutetian	yellow-white	Caenogastropoda
	Sinum (Sigaretotrema)	clathratum	(Gmelin, 1791)	Eocene	Lutetian	yellow-white	Caenogastropoda
Rissoidae	Rissoina (Fercurtia)	semistriata	(Lamarck, 1804)	Eocene	Lutetian	yellow-white	Caenogastropoda
	Rissoina (Rissoina)	clavula	(Deshayes, 1825)	Eocene	Lutetian	yellow-white	Caenogastropoda
Elachisinidae	Lacunella	depressa	(Deshayes, 1861)	Eocene	Lutetian	yellow-white	Caenogastropoda
Strombidae	Rimella	fissurella	(Linnaeus, 1767)	Eocene	Lutetian	yellow-white	Caenogastropoda
	Hippochrenes	fissura	(Coquebert & Brongniart, 1793)	Eocene	Lutetian	yellow-white	Caenogastropoda
	Hippochrenes	macroptera	(Lamarck, 1803)	Eocene	Lutetian	yellow-white	Caenogastropoda
	Hippochrenes	murchisoni	(Deshayes, 1865)	Eocene	Lutetian	yellow-white	Caenogastropoda
	Paraseraphs	placitus	Jung, 1974	Eocene	Lutetian	yellow-white	Caenogastropoda
	Paraseraphs	tetanus	Jung, 1974	Eocene	Ypresian	yellow-white	Caenogastropoda
	Paraseraphs	armoricus	(Vasseur, 1882)	Eocene	Bartonian	yellow-white	Caenogastropoda
	Seraphs	sopitus	(Solander in Brander, 1766)	Eocene	Bartonian	yellow-white	Caenogastropoda
	Seraphs	volutatus	(Solander in Brander, 1766)	Eocene	Lutetian	yellow-white	Caenogastropoda
	Seraphs	olivaceus	(Cossmann, 1889)	Eocene	Lutetian	yellow-white	Caenogastropoda
	Seraphs	chilophorus	(Cossmann, 1889)	Eocene	Lutetian	yellow-white	Caenogastropoda
	Seraphs	peterjungi	Caze, Merle, Pacaud & Saint Martin, 2010	Eocene	Lutetian	yellow-white	Caenogastropoda
	Diameza (Diameza)	fragilis	(Defrance, 1825)	Eocene	Lutetian	yellow-white	Caenogastropoda
	Diameza (Miniseraphs)	eratoides	(Cossmann, 1889)	Eocene	Lutetian	yellow-white	Caenogastropoda
	Diameza (Miniseraphs)	isabella	(Bernay in Deshayes, 1865)	Eocene	Lutetian	yellow-white	Caenogastropoda
Ficidae	Ficus (Ficopsis)	elegans	(Lamarck, 1803)	Eocene	Lutetian	yellow-white	Caenogastropoda
Ranellidae	Sassia (Cymatiella)	inornata	(Deshayes, 1865)	Eocene	Lutetian	yellow-white	Caenogastropoda
	Sassia (Sassia)	dumortieri	(Baudon, 1853)	Eocene	Lutetian	yellow-white	Caenogastropoda
Cassidae	Cassis (Morionella)	harpaeformis	Lamarck, 1803	Eocene	Lutetian	yellow-white	Caenogastropoda
Omalaxidae	Omalaxis	disjunctus	(Lamarck, 1804)	Eocene	Lutetian	no	Caenogastropoda
Epitoniidae	Acirsa (Acirsella)	canicularis	(Lamarck, 1804)	Eocene	Lutetian	yellow-white	Caenogastropoda
Eulimidae	Melanella (Vitreolina)	erronea	(Cossmann, 1904)	Eocene	Lutetian	yellow-white	Caenogastropoda
	Niso	terebellata	(Lamarck, 1804)	Eocene	Lutetian	yellow-white	Caenogastropoda
	Polygireulima	acuncula	(Deshayes, 1862)	Eocene	Lutetian	yellow-white	Caenogastropoda
	Polygireulima	acumen	(Deshayes, 1862)	Eocene	Lutetian	yellow-white	Caenogastropoda
	Polygireulima	deshayesi	(Cossmann, 1888)	Eocene	Lutetian	yellow-white	Caenogastropoda
Triphoridae	Triphora (Ogivia)	singularis	(Deshayes, 1864)	Eocene	Lutetian	yellow-white	Caenogastropoda
	Triphora (Triphora)	aspera	(Deshayes, 1864)	Eocene	Lutetian	yellow-white	Caenogastropoda
	Triphora (Norephora)	minuata	(Deshayes, 1864)	Eocene	Lutetian	yellow-white	Caenogastropoda
Cerithiopsidae	Cerithiopsis (Cerithiopsis)	diozodes	(Cossmann, 1889)	Eocene	Lutetian	yellow-white	Caenogastropoda
	Cerithiopsis (Cerithiopsis)	alveolata	(Deshayes, 1864)	Eocene	Lutetian	yellow-white	Caenogastropoda
Newtoniellidae	Colina	perelegans	(Deshayes, 1864)	Eocene	Lutetian	yellow-white	Caenogastropoda
	Cerithiella	clava	(Lamarck, 1804)	Eocene	Lutetian	yellow-white	Caenogastropoda
	Laiocochlis	chevalieri	(Cossmann, 1889)	Eocene	Lutetian	yellow-white	Caenogastropoda
Buccinidae	Metula (Celatoconus)	subdecussata	(d'Orbigny, 1850)	Eocene	Lutetian	yellow-white	Neogastropoda
	Coptochetus	gougeroti	Le Renard, 1994	Eocene	Lutetian	yellow-white	Neogastropoda
	Pseudoneptunea	scalarina	(Lamarck, 1803)	Eocene	Lutetian	yellow-white	Neogastropoda
	Eocantharus	excisus	(Lamarck, 1803)	Eocene	Lutetian	yellow-white	Neogastropoda
	Eocantharus	sp.		Eocene	Lutetian	yellow-white	Neogastropoda
	Janiopsis	calvimontensis	(Cossmann, 1889)	Eocene	Lutetian	yellow-white	Neogastropoda
	Janiopsis	parisiensis	(Deshayes, 1835)	Eocene	Lutetian	yellow-white	Neogastropoda
	Janiopsis	funiculosa	(Deshayes, 1835)	Eocene	Lutetian	yellow-white	Neogastropoda
	Editharus	costulatus	(Lamarck, 1822)	Eocene	Lutetian	yellow-white	Neogastropoda
	Editharus	copolygonus	(Pezant, 1908)	Eocene	Lutetian	yellow-white	Neogastropoda
Columbellidae	Columbellisipho	hordeola	(Lamarck, 1803)	Eocene	Lutetian	yellow-white	Neogastropoda
Fasciolariidae	Clavilithes (Cosmolithes)	subuniplicatus	(Grabau, 1904)	Eocene	Lutetian	yellow-white	Neogastropoda
	Clavilithes (Rhopalithes)	noae	(Holten, 1802)	Eocene	Lutetian	yellow-white	Neogastropoda
	Streptochetus	incertus	(Deshayes, 1835)	Eocene	Lutetian	yellow-white	Neogastropoda
Muricidae	?Paziella	plini	(de Raincourt, 1874)	Eocene	Lutetian	yellow-white	Neogastropoda
Mitridae	Mitraria (Mitraria)	plicatella	(Lamarck, 1803)	Eocene	Lutetian	yellow-white	Neogastropoda
	Mitra	sp.		Pliocene	Piacenzian	yellow-white	Neogastropoda
Volutidae	Lyria (Harpella)	subturgidula	(d'Orbigny, 1850)	Eocene	Lutetian	yellow-white	Neogastropoda
	Lyria (Harpella)	harpula	(Lamarck, 1802)	Eocene	Lutetian	yellow-white	Neogastropoda
	Volutocorbis	elevata	(Sowerby, 1840)	Eocene	Lutetian	yellow-white	Neogastropoda
	Volutocorbis	bicorona	(Lamarck, 1802)	Eocene	Lutetian	yellow-white	Neogastropoda
	Volutocorbis	crenulifera	(Bayan, 1870)	Eocene	Lutetian	yellow-white	Neogastropoda
	Athleta (Volutospina)	spinosa	(Linnaeus, 1758)	Eocene	Lutetian	yellow-white	Neogastropoda
	Athleta (Neoathleta)	citharoedus	(Holten, 1802)	Eocene	Lutetian	yellow-white	Neogastropoda
	Athleta (Neoathleta)	lyra	(Lamarck, 1802)	Eocene	Lutetian	yellow-white	Neogastropoda
	Eopsephaea	muricina	(Lamarck, 1802)	Eocene	Lutetian	yellow-white	Neogastropoda
	Eopsephaea	friderici	(Bayan, 1870)	Eocene	Lutetian	yellow-white	Neogastropoda
	Plejona	musicalis	(Lamarck, 1802)	Eocene	Lutetian	yellow-white	Neogastropoda
	Plejona	wateleti	(Deshayes, 1865)	Eocene	Ypresian	yellow-white	Neogastropoda
Volutomitridae	Harpula	mitreola	(Lamarck, 1802)	Eocene	Lutetian	yellow-white	Neogastropoda
	Leptoscapha	variculosa	(Lamarck, 1802)	Eocene	Lutetian	yellow-white	Neogastropoda
	Mitreola	mutica	(Lamarck, 1803)	Eocene	Lutetian	yellow-white	Neogastropoda
	Mitreola	maxwelli	Le Renard, 1994	Eocene	Lutetian	yellow-white	Neogastropoda
	Mitreola	labratula	(Lamarck, 1803)	Eocene	Lutetian	yellow-white	Neogastropoda
	Mitreola	raricosta	(Lamarck, 1803)	Eocene	Lutetian	yellow-white	Neogastropoda
	Mitreola	subplicata	(Deshayes, 1835)	Eocene	Lutetian	yellow-white	Neogastropoda
	Gibberula	ovulata	(Lamarck, 1803)	Eocene	Lutetian	yellow-white	Neogastropoda
	Gibberula	acutispira	(Cossmann, 1889)	Eocene	Lutetian	yellow-white	Neogastropoda
Cysticidae	Persicula	angystoma	(Deshayes, 1835)	Eocene	Lutetian	yellow-white	Neogastropoda
Harpidae	Eocithara (Eocithara)	mutica	(Lamarck, 1803)	Eocene	Lutetian	yellow-white	Neogastropoda
Costellariidae	Conomitra	fusellina	(Lamarck, 1803)	Eocene	Lutetian	yellow-white	Neogastropoda
	Conomitra	marginata	(Lamarck, 1803)	Eocene	Lutetian	yellow-white	Neogastropoda
	Conomitra	graniformis	(Lamarck, 1803)	Eocene	Lutetian	yellow-white	Neogastropoda
	Conomitra	cancellina	(Lamarck, 1803)	Eocene	Lutetian	yellow-white	Neogastropoda
	Vexillum (Uromitra)	terebellum	(Lamarck, 1803)	Eocene	Lutetian	yellow-white	Neogastropoda
	Vexillum (Uromitra)	barbieri	(Deshayes, 1865)	Eocene	Lutetian	yellow-white	Neogastropoda
Olividae	Olivancillaria (Pseudolivella)	mitreola	(Lamarck, 1802)	Eocene	Lutetian	yellow-white	Neogastropoda
	Ancillus (Ancillus)	buccinoides	(Lamarck, 1802)	Eocene	Lutetian	yellow-white	Neogastropoda
	Ancillus (Turancilla)	glandinus	(Deshayes, 1835)	Eocene	Lutetian	yellow-white	Neogastropoda
	Ancillarina	canalifera	(Lamarck, 1802)	Eocene	Lutetian	yellow-white	Neogastropoda
	Amalda	dubia	(Deshayes, 1830)	Eocene	Lutetian	yellow-white	Neogastropoda
	Amalda	olivula	(Lamarck, 1802)	Eocene	Lutetian	yellow-white	Neogastropoda
Conidae	Eoconus	diversiformis	(Deshayes, 1835)	Eocene	Lutetian	yellow-white	Neogastropoda
	Eoconus	deperditus	(Bruguière, 1792)	Eocene	Lutetian	yellow-white	Neogastropoda
	Eoconus	?turriculatus	(Deshayes, 1865)	Eocene	Lutetian	yellow-white	Neogastropoda
	Conus (Lithoconus)	antidiluvianus	Bruguière, 1792	Eocene	Lutetian	yellow-white	Neogastropoda
	Hemiconus	stromboides	(Lamarck, 1802)	Eocene	Lutetian	yellow-white	Neogastropoda
	Hemiconus	disjunctus	(Deshayes, 1865)	Eocene	Lutetian	yellow-white	Neogastropoda
	Hemiconus	defrancii	(Deshayes, 1865)	Eocene	Lutetian	yellow-white	Neogastropoda
	Conus	grateloupi	d'Orbigny, 1852	Oligocene	Rupelian	yellow-white	Neogastropoda
	Conus (Lithoconus)	mercati	(Brocchi, 1814)	Miocene	Langhian	yellow-white	Neogastropoda
	Conus (Dendroconus)	pseudoponderosus	Dollfus & Dautzenberg, 1952	Miocene	Langhian	yellow-white	Neogastropoda
	Conus (Lithoconus)	karreri	Hoernes & Auinger, 1879	Miocene	Langhian	yellow-white	Neogastropoda
	Conus (Chelyconus)	clavatulus	(d'Orbigny, 1852)	Miocene	Langhian	yellow-white	Neogastropoda
	Conus (Dendroconus)	maculosus	(Grateloup, 1835)	Miocene	Langhian	yellow-white	Neogastropoda
	Conus (Chelyconus)	gallicus	Mayer-Eymar, 1890	Miocene	Burdigalian	yellow-white	Neogastropoda
	Conus	aquitanicus	Mayer, 1858	Miocene	Burdigalian	yellow-white	Neogastropoda
	Conus	striatulus	Brocchi, 1814	Pliocene	Piacenzian	yellow-white	Neogastropoda
	Cryptoconus	clavicularis	(Lamarck, 1804)	Eocene	Lutetian	yellow-white	Neogastropoda
	Cryptoconus	inaequistriatus	(Deshayes, 1865)	Eocene	Lutetian	yellow-white	Neogastropoda
	Cryptoconus	lineolatus	(Lamarck, 1804)	Eocene	Lutetian	yellow-white	Neogastropoda
	Cryptoconus	filosus	(Lamarck, 1804)	Eocene	Lutetian	yellow-white	Neogastropoda
	Cryptoconus	glabratus	(Lamarck, 1804)	Eocene	Lutetian	yellow-white	Neogastropoda
	Cryptoconus	elongatus	(Deshayes, 1834)	Eocene	Lutetian	yellow-white	Neogastropoda
	Conorbis	subangulatus	(Deshayes, 1834)	Eocene	Lutetian	yellow-white	Neogastropoda
	Conorbis	marginatus	(Lamarck, 1804)	Eocene	Lutetian	yellow-white	Neogastropoda
	Cryptoconus	sp.		Eocene	Bartonian	yellow-white	Neogastropoda
	Borsonia (Cordieria)	nodulosa	(Lamarck,1803)	Eocene	Lutetian	yellow-white	Neogastropoda
	Borsonia (Cordieria)	gliberti	Le Renard, 1994	Eocene	Lutetian	yellow-white	Neogastropoda
	Acamptogenotia	coronata	(Lamarck,1803)	Eocene	Lutetian	yellow-white	Neogastropoda
	Acamptogenotia	colpophora	(Cossmann, 1889)	Eocene	Lutetian	yellow-white	Neogastropoda
	Siphonaliopsis	minuta	(Lamarck, 1803)	Eocene	Lutetian	yellow-white	Neogastropoda
	Siphonaliopsis	vokesae	Le Renard, 1995	Eocene	Lutetian	yellow-white	Neogastropoda
	Siphonaliopsis	chaussyensis	(Cossmann, 1889)	Eocene	Lutetian	yellow-white	Neogastropoda
	Siphonaliopsis	truncata	(Baudon, 1853)	Eocene	Lutetian	yellow-white	Neogastropoda
	Siphopsis	distorta	(Deshayes, 1865)	Eocene	Lutetian	yellow-white	Neogastropoda
	Pseudoandonia	chaussyensis	(Cossmann, 1889)	Eocene	Lutetian	yellow-white	Neogastropoda
	Pseudoandonia	gougeroti	Le Renard, 1989	Eocene	Lutetian	yellow-white	Neogastropoda
	Siphopsis	seminuda	(Deshayes, 1864)	Eocene	Lutetian	yellow-white	Neogastropoda
	Siphopsis	tenuiplicata	(Cossmann, 1889)	Eocene	Lutetian	yellow-white	Neogastropoda
Turridae	Epalxis (Epalxis)	ventricosa	(Lamarck, 1804)	Eocene	Lutetian	yellow-white	Neogastropoda
	Eopleurotoma	fercutensis	(Cossmann, 1889)	Eocene	Lutetian	yellow-white	Neogastropoda
	Eopleurotoma	decussata	(Lamarck, 1804)	Eocene	Lutetian	yellow-white	Neogastropoda
	Knefastia	polygona	(Deshayes, 1834)	Eocene	Lutetian	yellow-white	Neogastropoda
	Apiotoma	pyrulata	(Deshayes, 1834)	Eocene	Lutetian	yellow-white	Neogastropoda
	Crassispira (Tripia)	danjouxii	(Baudon, 1853)	Eocene	Lutetian	yellow-white	Neogastropoda
	Crassispira (Tripia)	margaritula	(Deshayes, 1834)	Eocene	Lutetian	yellow-white	Neogastropoda
	Crassispira (Crassispira)	tuckeri	Le Renard, 1994	Eocene	Lutetian	yellow-white	Neogastropoda
	Crassispira (Crassispira)	nodulosa	(Lamarck, 1804)	Eocene	Lutetian	yellow-white	Neogastropoda
Clavatulidae	Turricula (Crenaturricula)	brevicauda	(Deshayes, 1834)	Eocene	Lutetian	yellow-white	Neogastropoda
	Turricula (Crenaturricula)	dentata	(Lamarck, 1804)	Eocene	Lutetian	yellow-white	Neogastropoda
	Turricula (Catenotoma)	catenata	(Lamarck, 1804)	Eocene	Lutetian	yellow-white	Neogastropoda
Terebridae	Mirula	plicatula	(Lamarck, 1803)	Eocene	Lutetian	yellow-white	Neogastropoda
Cancellariidae	Sveltella	biplicata	(Lamarck, 1803)	Eocene	Lutetian	yellow-white	Neogastropoda
	Unitas	costulata	(Lamarck, 1803)	Eocene	Lutetian	yellow-white	Neogastropoda
	Plesiotriton	volutella	(Lamarck, 1803)	Eocene	Lutetian	yellow-white	Neogastropoda
Architectonicidae	Granosolarium	canaliculatum	(Lamarck, 1804)	Eocene	Lutetian	yellow-white	Heterobranchia
	Torinia (Climacopoma)	patula	(Lamarck, 1804)	Eocene	Lutetian	yellow-white	Heterobranchia
Mathildidae	Tuba	sculpta	(Sowerby, 1823)	Eocene	Lutetian	yellow-white	Heterobranchia
	Tuba	cyclostomoides	(Deshayes, 1861)	Eocene	Lutetian	yellow-white	Heterobranchia
Pyramidellidae	Syrnola (Puposyrnola)	parva	(Deshayes, 1861)	Eocene	Lutetian	yellow-white	Heterobranchia
	Odostomia (Odostomia)	turbonilloides	Deshayes, 1861	Eocene	Lutetian	yellow-white	Heterobranchia
Bullidae	Acrocolpus	plicatus	(Deshayes, 1824)	Eocene	Lutetian	yellow-white	Heterobranchia
Haminoeidae	Roxania	lamarckii	(Deshayes, 1863)	Eocene	Lutetian	yellow-white	Heterobranchia
Ceritellidae	Pseudonerinea	caecilia	(d'Orbigny, 1851)	Late Jurassic	Oxfordian	yellow-white	Heterobranchia
BIVALVIA
Nuculidae	Nucula (Nucula)	terminalis	Deshayes, 1858	Eocene	Lutetian	yellow-white	Protobranchia
Nuculanidae	Nuculana (Sacella)	striata	(Lamarck, 1805)	Eocene	Lutetian	yellow-white	Protobranchia
Arcidae	Arca	biangula	Lamarck, 1805	Eocene	Lutetian	yellow-white	Pteriomorphia
	Barbatia (Rostarca)	punctifera	(Deshayes, 1829)	Eocene	Lutetian	yellow-white	Pteriomorphia
Glycymerididae	Glycymeris	dispar	(Defrance, 1826)	Eocene	Lutetian	yellow-white	Pteriomorphia
	Glycymeris	pulvinatus	(Lamarck, 1805)	Eocene	Lutetian	yellow-white	Pteriomorphia
Noetiidae	Striarca (Arcopsis)	quadrilatera	(Lamarck, 1805)	Eocene	Lutetian	yellow-white	Pteriomorphia
	Scapularca	scapulina	(Lamarck, 1805)	Eocene	Lutetian	yellow-white	Pteriomorphia
	Trinacria	cancellata	(Deshayes, 1858)	Eocene	Lutetian	yellow-white	Pteriomorphia
Mytilidae	Septifer	pissaroi	Le Renard, 1994	Eocene	Lutetian	yellow-white	Pteriomorphia
	Brachidontes (Hormomya)	rigaulti	(Deshayes, 1858)	Eocene	Lutetian	yellow-white	Pteriomorphia
	Crenella (Crenella)	striatina	Deshayes, 1858	Eocene	Lutetian	yellow-white	Pteriomorphia
	Musculus (Planimodiola)	sulcatus	(Lamarck, 1805)	Eocene	Lutetian	yellow-white	Pteriomorphia
	Modiolus	imbricatus	Sowerby, 1818	Late Jurassic	Oxfordian	yellow-white	Pteriomorphia
Pteriidae	Pteria (Electroma)	trigonata	(Lamarck, 1819)	Eocene	Lutetian	yellow-white	Pteriomorphia
Spondylidae	Spondylus	radula	Lamarck, 1806	Eocene	Lutetian	yellow-white	Pteriomorphia
Plicatulidae	Plicatula	roissyi	Defrance, 1826	Eocene	Lutetian	yellow-white	Pteriomorphia
Carditidae	Venericardia	acuticosta	Lamarck, 1806	Eocene	Lutetian	yellow-white	Heterodonta
	Venericardia	granulata	Defrance, 1828	Eocene	Lutetian	yellow-white	Heterodonta
	Venericardia	imbricata	(Gmelin, 1791)	Eocene	Lutetian	yellow-white	Heterodonta
Astartidae	Neocrassina	ovata	(Smith, 1817)	Late Jurassic	Oxfordian	yellow-white	Heterodonta
	Nicaniella	communis	(Zittel & Goubert, 1861)	Late Jurassic	Oxfordian	yellow-white	Heterodonta
	Nicaniella	bruni	Chavan, 1952	Late Jurassic	Oxfordian	yellow-white	Heterodonta
	Nicaniella	morini	(de Loriol, 1875)	Late Jurassic	Oxfordian	yellow-white	Heterodonta
Neomiodontidae	Neomiodon	percrassus	Chavan, 1945	Late Jurassic	Oxfordian	yellow-white	Heterodonta
	Neomiodon	ovatostriatus	Chavan, 1945	Late Jurassic	Oxfordian	yellow-white	Heterodonta
Veneridae	Venerella	anceps	(Deshayes, 1857)	Eocene	Lutetian	yellow-white	Heterodonta
	Venerella	deleta	(Deshayes, 1857)	Eocene	Lutetian	yellow-white	Heterodonta
	Katelysia (Textivenus)	scobinellata	(Lamarck, 1806)	Eocene	Lutetian	yellow-white	Heterodonta
	Pitar (Paradione)	lunularia	(Deshayes, 1825)	Eocene	Lutetian	yellow-white	Heterodonta
	Pitar (Paradione)	sulcataria	(Deshayes, 1825)	Eocene	Lutetian	yellow-white	Heterodonta
	Costacallista	laevigata	(Lamarck, 1806)	Eocene	Lutetian	yellow-white	Heterodonta
	Meroena	polita	(Lamarck, 1806)	Eocene	Lutetian	yellow-white	Heterodonta
	Tivelina	analoga	(Deshayes, 1857)	Eocene	Lutetian	yellow-white	Heterodonta
	Tivelina	gibbosula	(Deshayes, 1857)	Eocene	Lutetian	yellow-white	Heterodonta
	Pelecyora	incrassata	(Sowerby, 1817)	Oligocene	Rupelian	yellow-white	Heterodonta
Lucinidae	Pseudomiltha (Pseudomiltha)	mutabilis	(Lamarck, 1807)	Eocene	Lutetian	yellow-white	Heterodonta
	Fimbria	lamellosa	(Lamarck, 1806)	Eocene	Lutetian	yellow-white	Heterodonta
	Jagonoma	circumcisa	(Zittel & Goubert, 1861)	Late Jurassic	Oxfordian	yellow-white	Heterodonta
	Mesomiltha	pulchra	(Zittel & Goubert, 1861)	Late Jurassic	Oxfordian	yellow-white	Heterodonta
	Mesolinga	typica	Chavan, 1952	Late Jurassic	Oxfordian	yellow-white	Heterodonta
Cardiidae	Cardium (Orthocardium)	hopneri	Glibert & Van de Poel, 1970	Eocene	Lutetian	yellow-white	Heterodonta
Aviculariidae	Avicularium	lithocardium	(Linnaeus, 1771)	Eocene	Lutetian	yellow-white	Heterodonta
Semelidae	Abra	difficilis	(Deshayes, 1857)	Eocene	Lutetian	yellow-white	Heterodonta
Psammobiidae	Gari (Psammodonax)	caillati	(Deshayes, 1857)	Eocene	Lutetian	yellow-white	Heterodonta
Trapezidae	Straelenotrapezium	brocchii	(Defrance, 1828)	Eocene	Lutetian	yellow-white	Heterodonta
	Trapezium (Neotrapezium)	grignonense	(Deshayes, 1824)	Eocene	Lutetian	yellow-white	Heterodonta
Myophorellidae	Myophorella	bronni	(Agassiz, 1840)	Late Jurassic	Oxfordian	yellow-white	Paleoheterodonta
